# Supplementary material for: An Overlooked Hepcidin–Cadmium Connection
Source: MDPI journal article supplement (doi:10.3390/ijms232415483), 2022-12-07
Supplement: s1 [file s1]

## SUPPORTING INFORMATION

### An Overlooked Hepcidin-Cadmium Connection

Dawid Płonka <sup>1</sup>, Marta D. Wiśniewska <sup>1</sup>, Manuel D. Peris-Díaz <sup>2</sup>, Artur Krężel <sup>2</sup>,  
Arkadiusz M. Bonna <sup>1</sup> and Wojciech Bal <sup>1,\*</sup>

<sup>1</sup> Institute of Biochemistry and Biophysics, Polish Academy of Sciences, Pawińskiego 5a,  
02-106 Warsaw, Poland

<sup>2</sup> Department of Chemical Biology, Faculty of Biotechnology, University of Wrocław,  
Joliot-Curie 14a, 50-383 Wrocław, Poland

\* Correspondence: wbal@ibb.waw.pl

### Supporting figures

|                    |                                          |
|--------------------|------------------------------------------|
| <b>MT2</b>         | KSCCSCCPVGC <b>AKCAQGC</b> ICKGASDKCSCCA |
| <b>hepcidin-25</b> | DTHFPIC <b>IFCCG</b> CCHRSKCGMCCKT       |
| <b>5R-hepcidin</b> | RRRRRDTHFPIC <b>IFCCG</b> CCHRSKCGMCCKT  |

**Scheme S1.** Comparison of sequences of  $\alpha$ -domain of human metallothionein 2, hepcidin-25 and 5R-hepcidin (Cys residues set in bold).

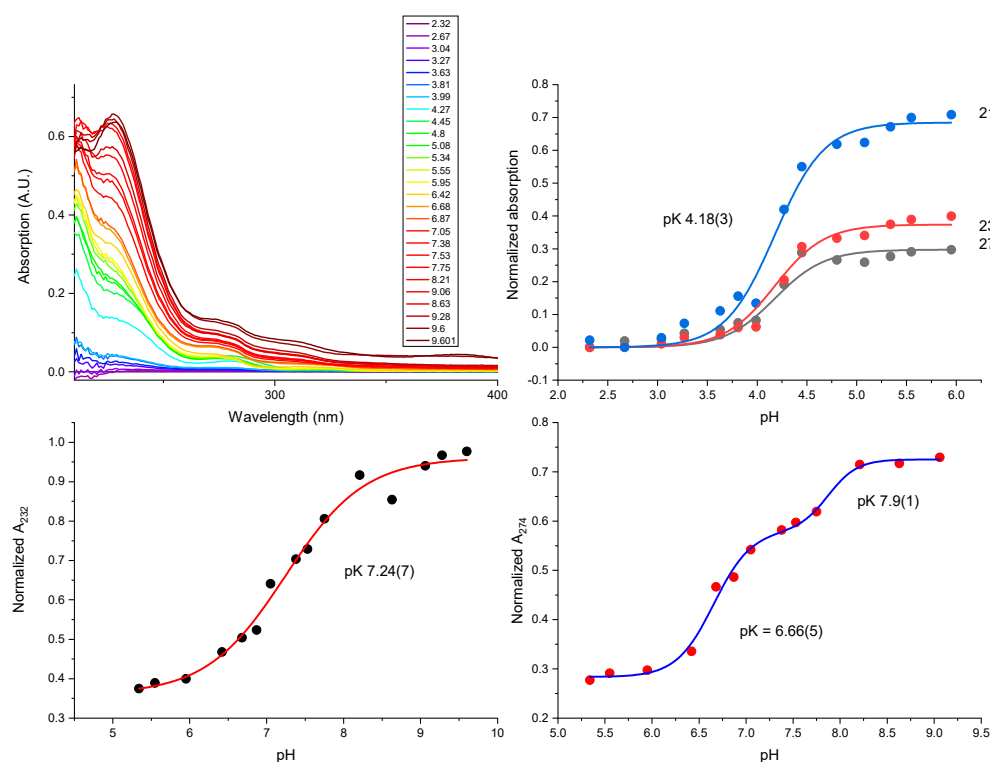

**Figure S1.** The UV pH-metric titration of 20  $\mu$ M reduced 5R-hepcidin and the apparent pK values derived at various characteristic wavelengths.

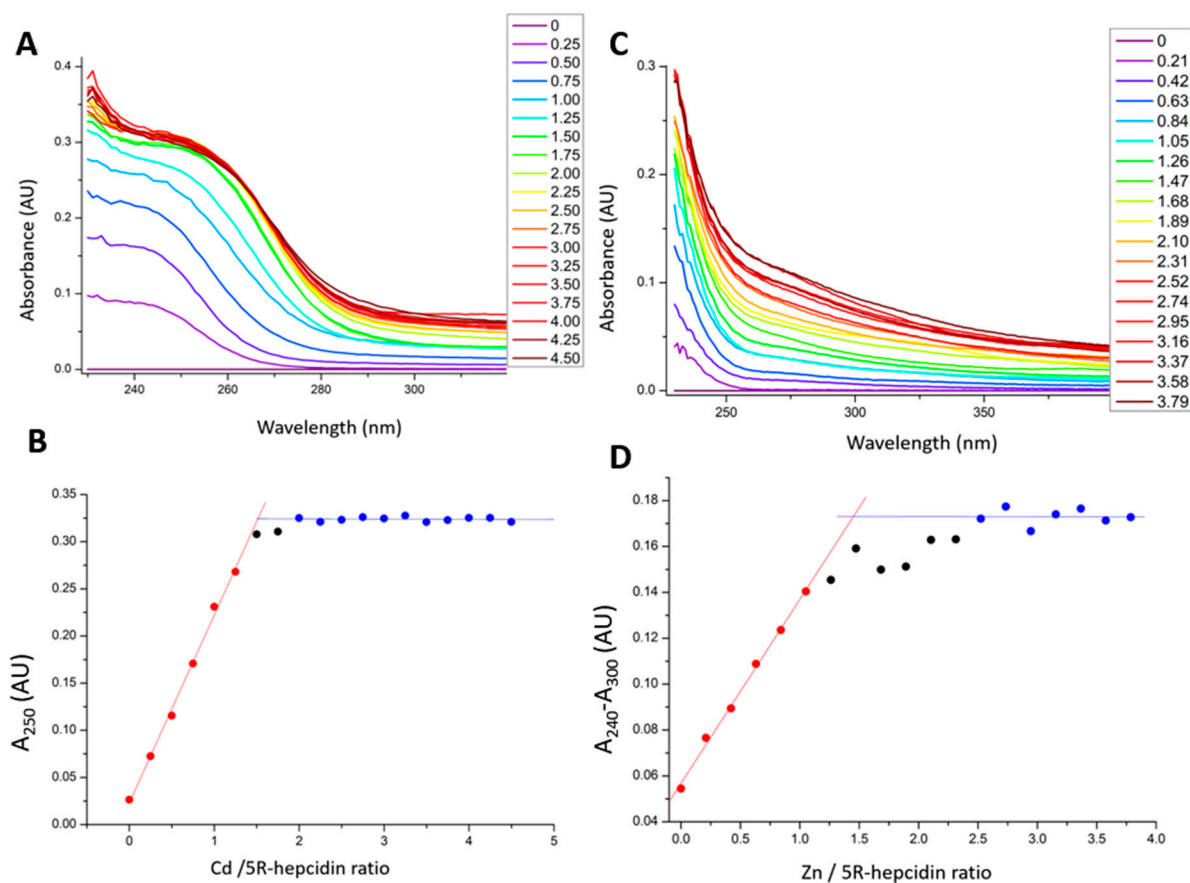

**Figure S2.** 10  $\mu$ M 5R-hepcidin in 50 mM HEPES pH 7.4, with  $I=100$  mM established by NaCl, titrated with cadmium acetate, (A) presents the spectra, (B) presents the titration curve at 250 nm; and  $ZnCl_2$ , (C) presents the spectra, (D) presents the differential titration curve at 240 nm – 300 nm. Cd(II) and Zn(II) to peptide ratios are color coded on the plots.

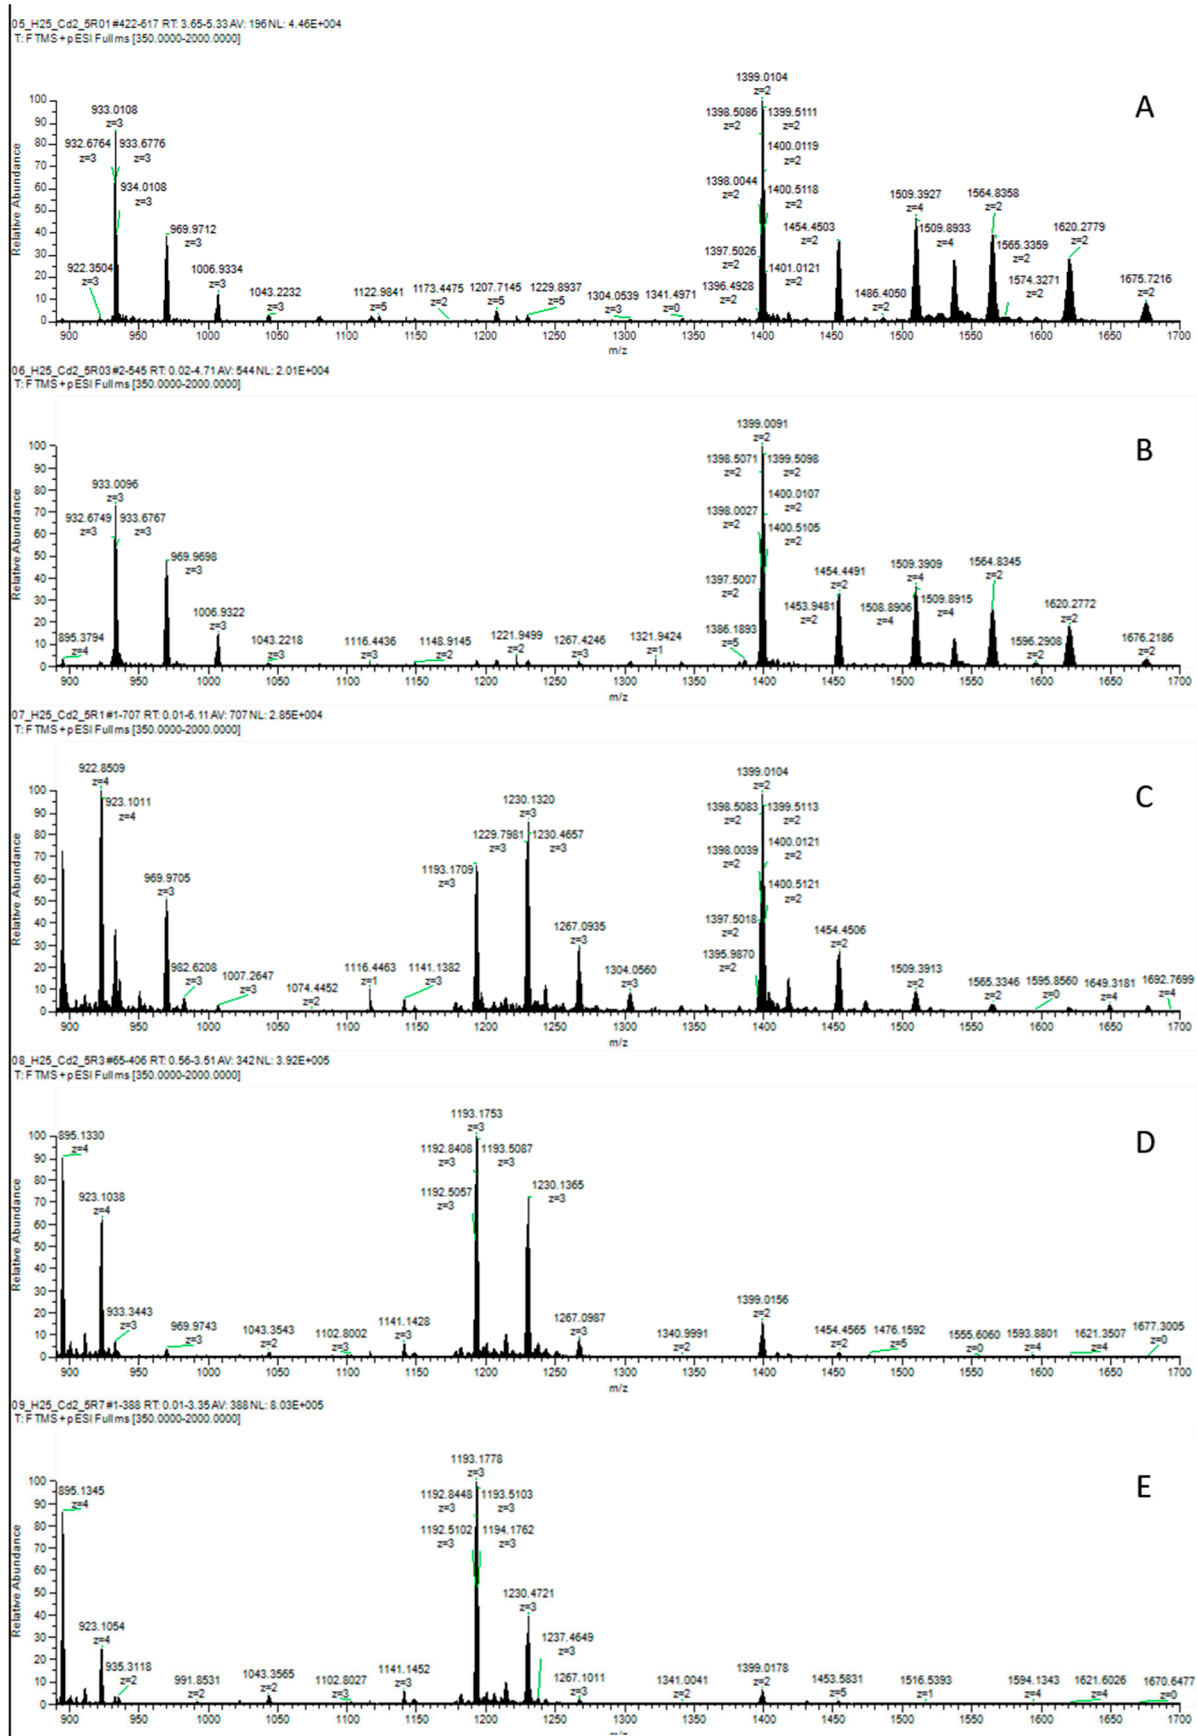

**Figure S3.** Native mass spectra of 10  $\mu$ M Hepcidin-25 with 20  $\mu$ M Cd(II) acetate with varying concentration of 5R-hepcidin: A) 1  $\mu$ M, B) 3  $\mu$ M, C) 10  $\mu$ M, D) 30  $\mu$ M, E) 70  $\mu$ M in ammonium acetate pH 7.4.

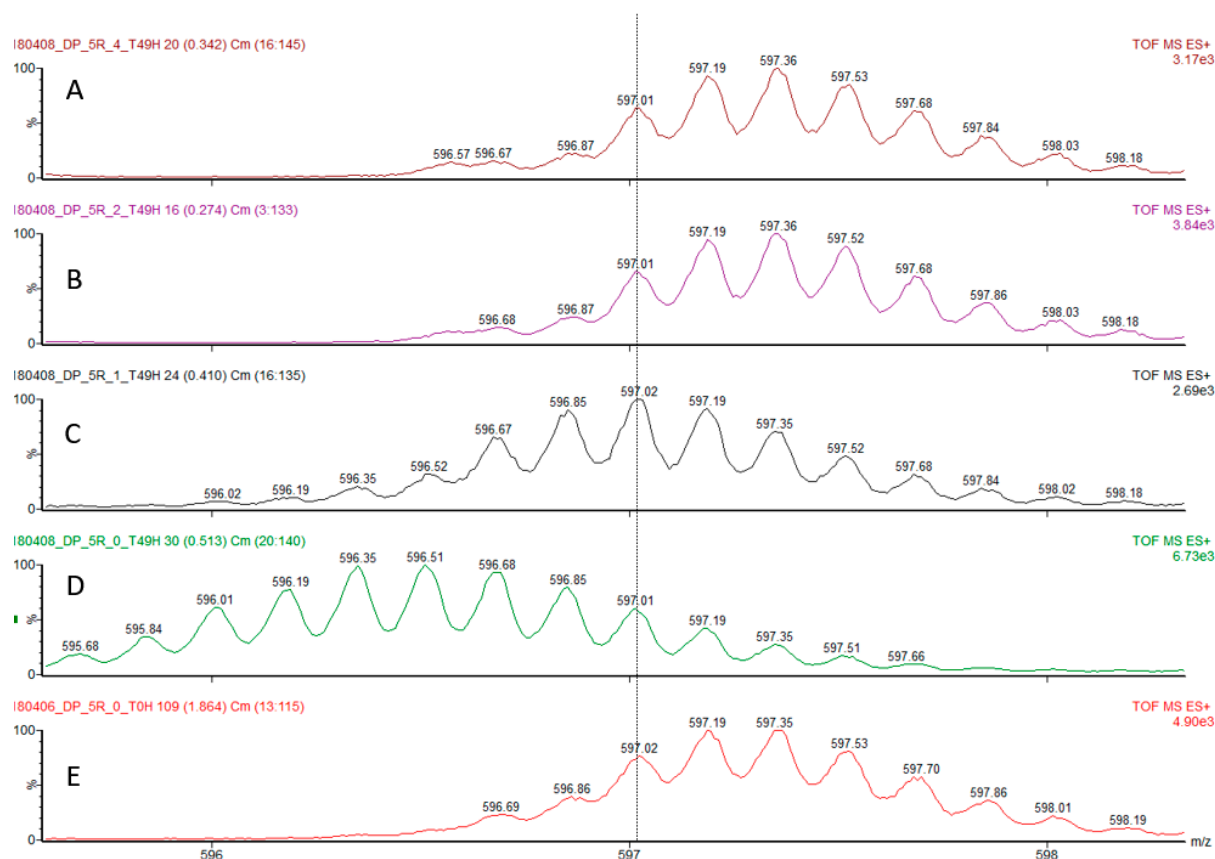

**Figure S4.** 5R-hepcidin (100  $\mu$ M) incubated with 4, 2, 1 and 0 Cd(II) equivalents (A, B, C and D respectively) for 49 hours in pH 6, with the initial sample presented in E. The disulfide formation was monitored at ESI-QToF MS at 6+ charged peptide ions  $[M+6H]^{6+}$ . The isotopic distribution shift to left, indicating the loss of two H atoms for each disulfide formed. The monoisotopic peak of reduced peptide is marked with the dotted line. Small peaks left from the dotted line (one S-S bond) in all samples occurred during sample preparation process.

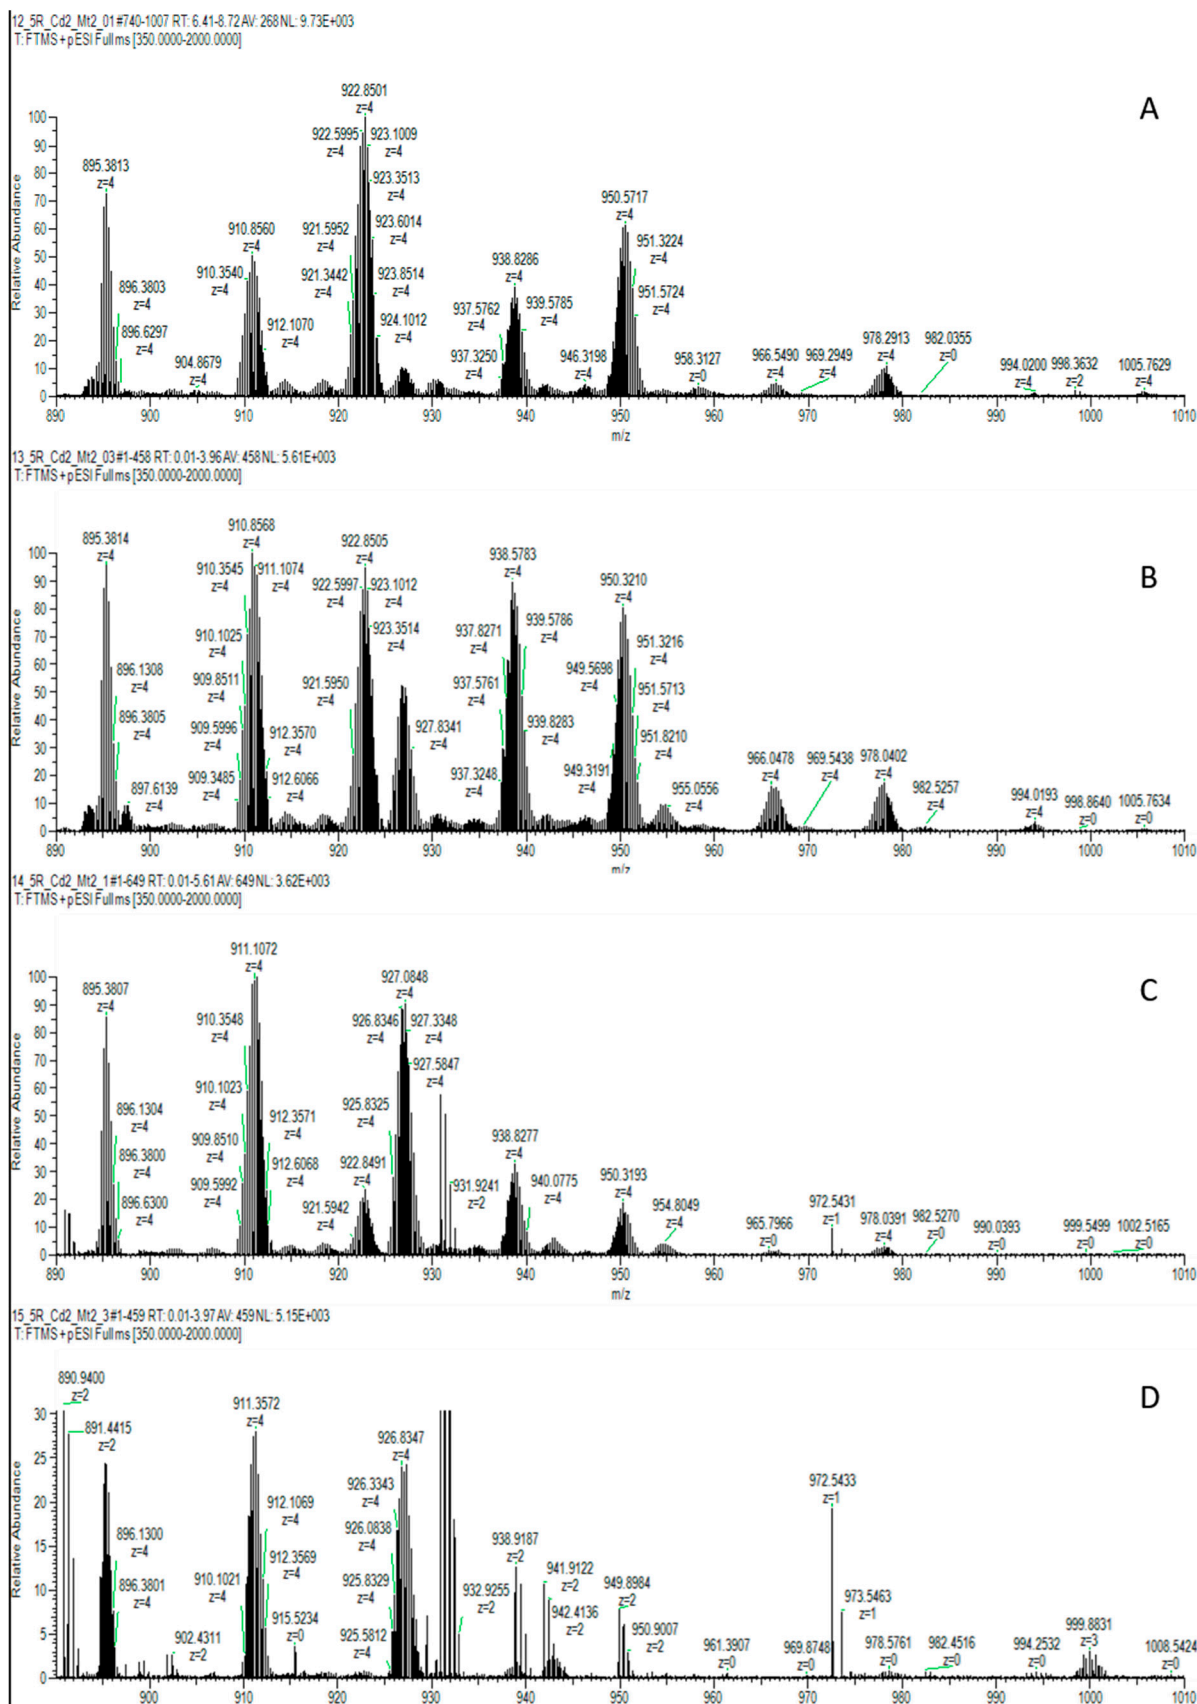

**Figure S5.** Native mass spectra of 10  $\mu\text{M}$  5R-hepcidin with 20  $\mu\text{M}$  Cd(II) acetate with varying concentration of metallothionein MT2A: A) 1  $\mu\text{M}$ , B) 3  $\mu\text{M}$ , C) 10  $\mu\text{M}$ , D) 30  $\mu\text{M}$  in ammonium acetate pH 7.4 Due to high noise and differing intensities, for better clarity only fragment for 5R-hepcidin is shown, the fragment with peaks associated with MT2A is shown in Fig. S6.

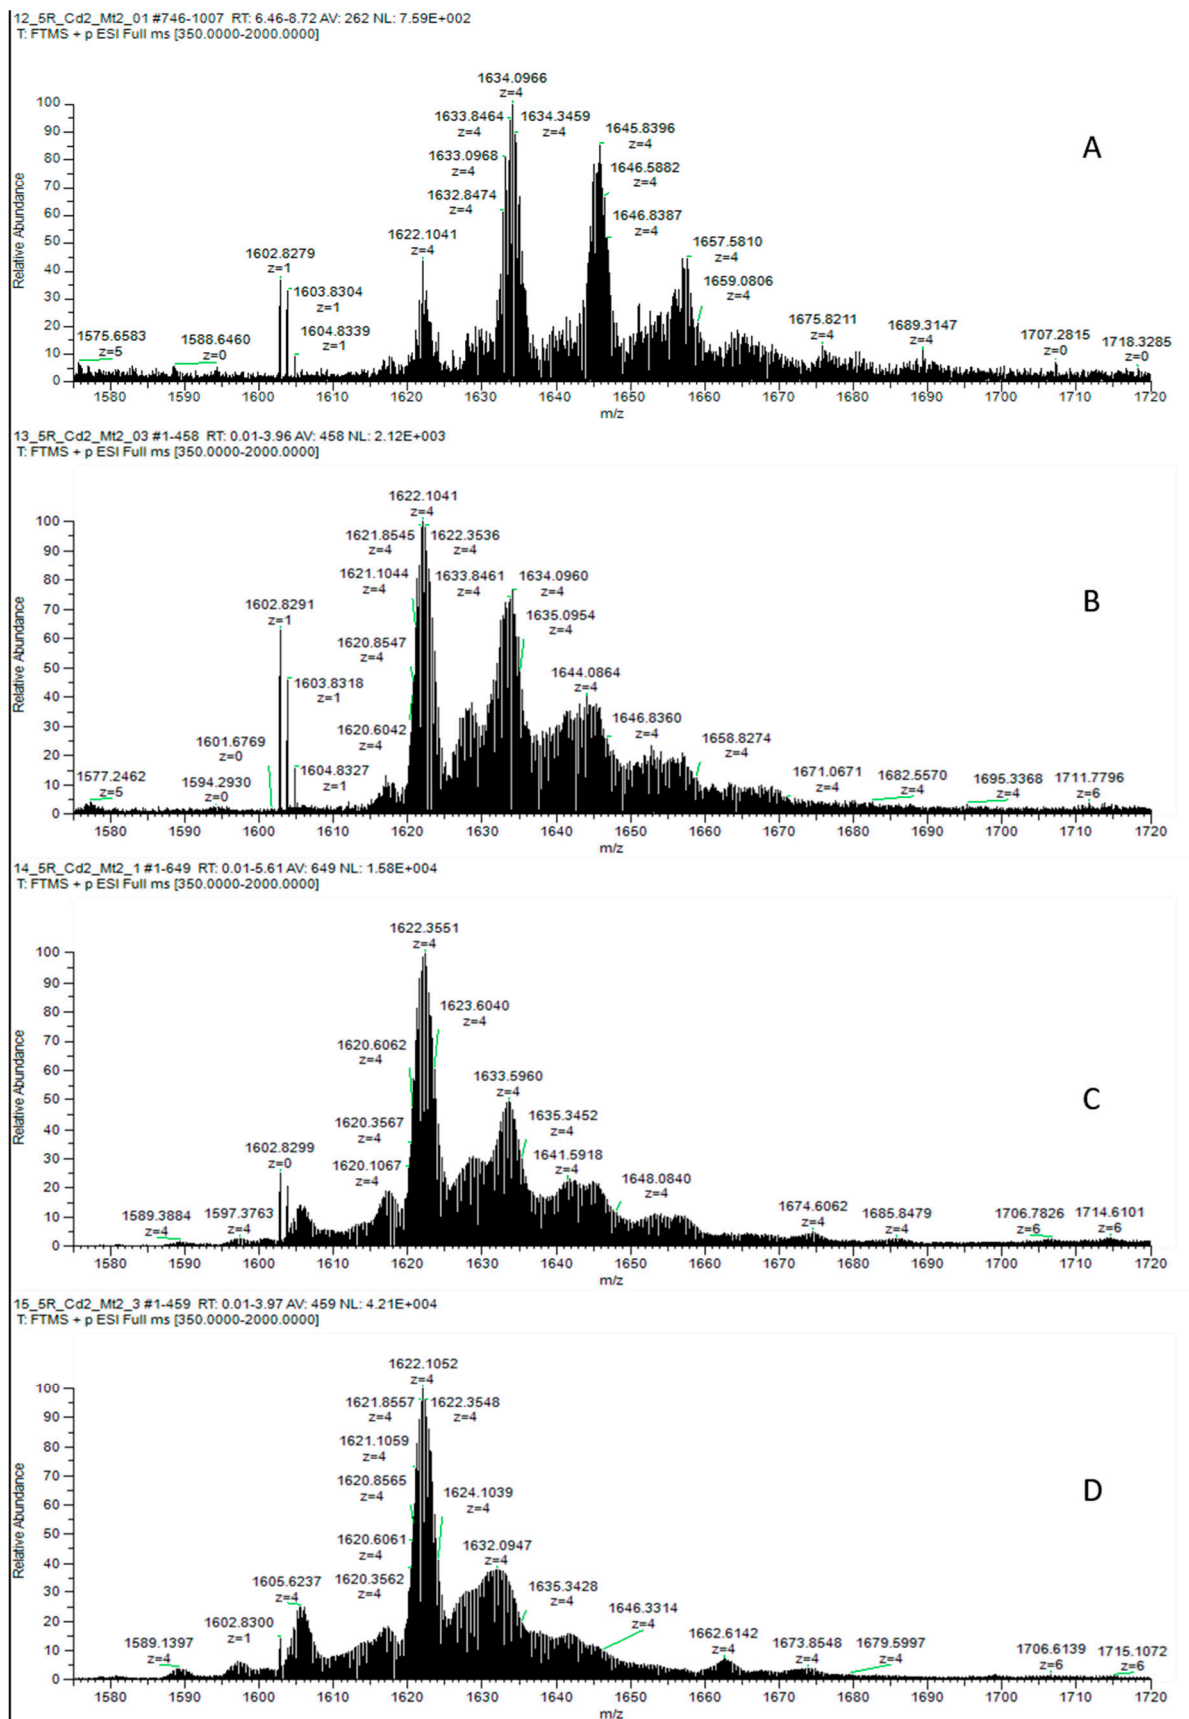

**Figure S6.** Native mass spectra of 10  $\mu$ M 5R-hepcidin with 20  $\mu$ M Cd(II) acetate with varying concentration of metallothionein MT2A: A) 1  $\mu$ M, B) 3  $\mu$ M, C) 10  $\mu$ M, D) 30  $\mu$ M in ammonium acetate pH 7.4. Due to high noise and differing intensities, for better clarity only peaks associated with MT2A is shown, the spectrum fragment with peaks associated with 5R-hepcidin is shown in Fig. S5.
